# Supplementary material for: CpBBX19, a B-Box Transcription Factor Gene of Chimonanthus praecox, Improves Salt and Drought Tolerance in Arabidopsis
Source: MDPI journal article supplement (doi:10.3390/genes12091456), 2021-09-21
Supplement: s1 [file s1]

**Table S1.** List of primers.

| Primer name              | Primer sequences (5'-3')                          |
|--------------------------|---------------------------------------------------|
| <i>CpBBX19-F</i>         | GAAGGGAAATGAAAGGTGG                               |
| <i>CpBBX19-R</i>         | CTTCTTTAAGCCGCCAATAGTC                            |
| <i>CpBBX19-F1</i>        | ATGCGAACCCTCTGCGACGTTTGC                          |
| <i>CpBBX19-R2</i>        | TTACTTCTCACACACACCTTTG                            |
| <i>pGWB551-CpBBX19-F</i> | <u>GGGGACAAGTTTGTACAAAAAAGCAGGCT</u> <sup>1</sup> |
|                          | GAAGGGAAATGAAAGGTGG                               |
| <i>pGWB551-CpBBX19-R</i> | <u>GGGGACCACTTTGTACAAGAAAGCTGGGT</u> <sup>2</sup> |
|                          | CTTCTTTAAGCCGCCAATAGTC                            |
| RT- <i>CpActin-F</i>     | AGGCTAAGATTCAAGACAAGG                             |
| RT- <i>CpActin-R</i>     | TTGGTCGCAGCTGATTGCTGTG                            |
| RT- <i>AtActin-F</i>     | CTTCGTCCTCCACTTCAG                                |
| RT- <i>AtActin-R</i>     | ATCATACCAGTCTCAACAC                               |
| RT- <i>CpBBX19-F</i>     | AACCTAGTTCTTGTGAAGACTTGGC                         |
| RT- <i>CpBBX19-R</i>     | CATCCATGTTAGCATCATTAGTTGG                         |
| SP1                      | CTCAACTGGGTCCATTGGTTGCAAG                         |
| SP2                      | TAAAAGAAAGCAGGTGCATTTTCACATATG                    |

<sup>1</sup> stands for *attB1*, <sup>2</sup> stands for *attB2*

**Table S2.** Analysis of cis-acting elements of promoters. The amounts are the sum of Cis-elements in sense and antisense strand.

| No. | Name of elements | Amount | Sequence                | function                                                                  |
|-----|------------------|--------|-------------------------|---------------------------------------------------------------------------|
| 1   | TATA-box         | 1      | TATA                    | core promoter element<br>common cis-acting element                        |
| 2   | CAAT-box         | 1      | CAAAT/CAAT/CCAAT        | in promoter and enhancer<br>regions                                       |
| 3   | ABRE             | 3      | GCAACGTGTC/ACGTG/CACGTG | cis-acting element involved<br>in the abscisic acid<br>responsiveness     |
| 4   | ARE              | 1      | AAACCA                  | cis-acting regulatory<br>element essential for the<br>anaerobic induction |
| 5   | CGTCA-motif      | 2      | CGTCA                   | cis-acting regulatory<br>element involved in the<br>MeJA-responsiveness   |
| 6   | MBS              | 1      | CAACTG                  | MYB binding site involved<br>in drought-inducibility                      |
| 7   | MYB              | 2      | CAACCA                  |                                                                           |
| 8   | MYC              | 4      | CATTTG                  |                                                                           |
| 9   | MYb              | 1      | CAACTG                  |                                                                           |
| 10  | MYc              | 1      | TCTCTTA                 |                                                                           |
| 11  | TC-rich          | 1      | GTTTTCTTAC              | cis-acting element involved<br>in defense and stress                      |

|    |             |   |            |                                                                                      |
|----|-------------|---|------------|--------------------------------------------------------------------------------------|
| 12 | TCA-element | 1 | CCATCTTTTT | responsiveness<br>cis-acting element involved<br>in salicylic acid<br>responsiveness |
| 13 | TGACG-motif | 2 | TGACG      | cis-acting regulatory<br>element involved in the<br>MeJA-responsiveness              |

**Table S3.** Names and accession numbers used for phylogenetic analysis

| Name    | Species                     | Accession number |
|---------|-----------------------------|------------------|
| AtBBX1  | <i>Arabidopsis thaliana</i> | AT5G15840        |
| AtBBX2  | <i>Arabidopsis thaliana</i> | AT5G15850        |
| AtBBX3  | <i>Arabidopsis thaliana</i> | AT3G02380        |
| AtBBX4  | <i>Arabidopsis thaliana</i> | AT2G24790        |
| AtBBX5  | <i>Arabidopsis thaliana</i> | AT5G24930        |
| AtBBX6  | <i>Arabidopsis thaliana</i> | AT5G57660        |
| AtBBX7  | <i>Arabidopsis thaliana</i> | AT3G07650        |
| AtBBX8  | <i>Arabidopsis thaliana</i> | AT5G48250        |
| AtBBX9  | <i>Arabidopsis thaliana</i> | AT4G15250        |
| AtBBX10 | <i>Arabidopsis thaliana</i> | AT3G21880        |
| AtBBX11 | <i>Arabidopsis thaliana</i> | AT2G47890        |
| AtBBX12 | <i>Arabidopsis thaliana</i> | AT2G33500        |
| AtBBX13 | <i>Arabidopsis thaliana</i> | AT1G28050        |
| AtBBX14 | <i>Arabidopsis thaliana</i> | AT1G68520        |
| AtBBX15 | <i>Arabidopsis thaliana</i> | AT1G25440        |
| AtBBX16 | <i>Arabidopsis thaliana</i> | AT1G73870        |
| AtBBX17 | <i>Arabidopsis thaliana</i> | AT1G49130        |
| AtBBX18 | <i>Arabidopsis thaliana</i> | AT2G21320        |
| AtBBX19 | <i>Arabidopsis thaliana</i> | AT4G38960        |
| AtBBX20 | <i>Arabidopsis thaliana</i> | AT4G39070        |
| AtBBX21 | <i>Arabidopsis thaliana</i> | AT1G75540        |
| AtBBX22 | <i>Arabidopsis thaliana</i> | AT1G78600        |
| AtBBX23 | <i>Arabidopsis thaliana</i> | AT4G10240        |
| AtBBX24 | <i>Arabidopsis thaliana</i> | AT1G06040        |
| AtBBX25 | <i>Arabidopsis thaliana</i> | AT2G31380        |
| AtBBX26 | <i>Arabidopsis thaliana</i> | AT1G60250        |
| AtBBX27 | <i>Arabidopsis thaliana</i> | AT1G68190        |
| AtBBX28 | <i>Arabidopsis thaliana</i> | AT4G27310        |
| AtBBX29 | <i>Arabidopsis thaliana</i> | AT5G54470        |
| AtBBX30 | <i>Arabidopsis thaliana</i> | AT4G15248        |
| AtBBX31 | <i>Arabidopsis thaliana</i> | AT3G21890        |
| AtBBX32 | <i>Arabidopsis thaliana</i> | AT3G21150        |

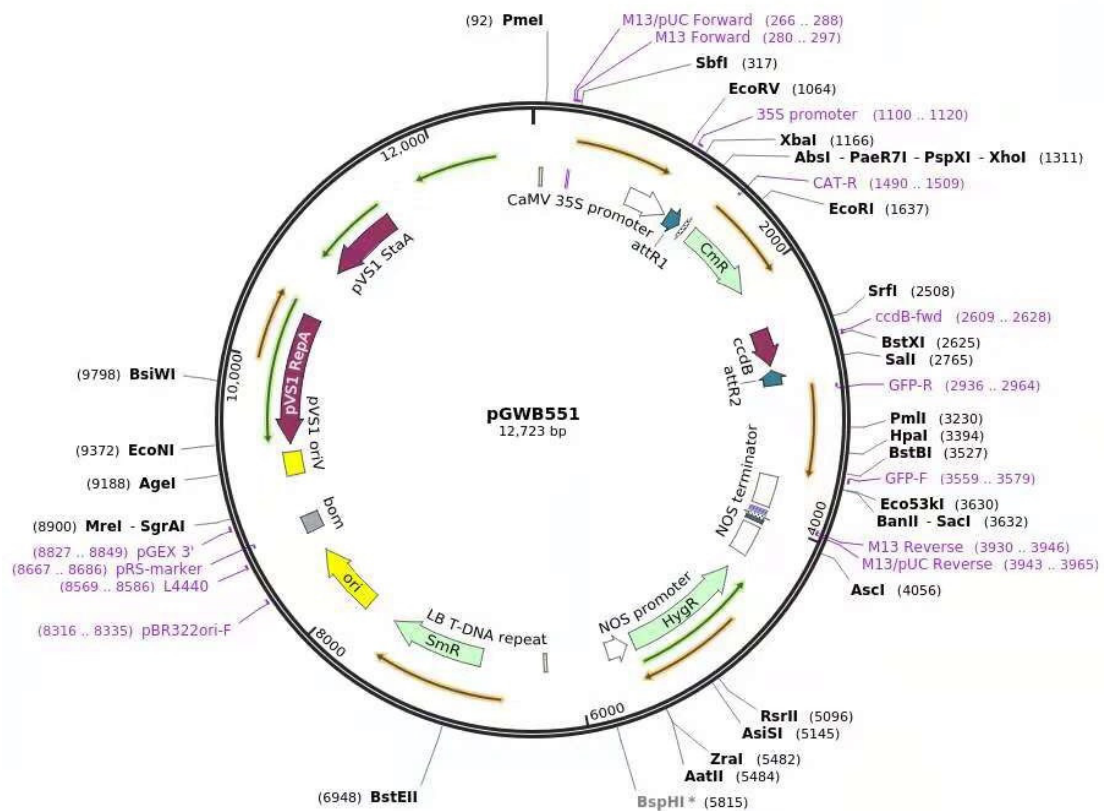

**Figure S1.** The simple map of the pGWB551 vector.

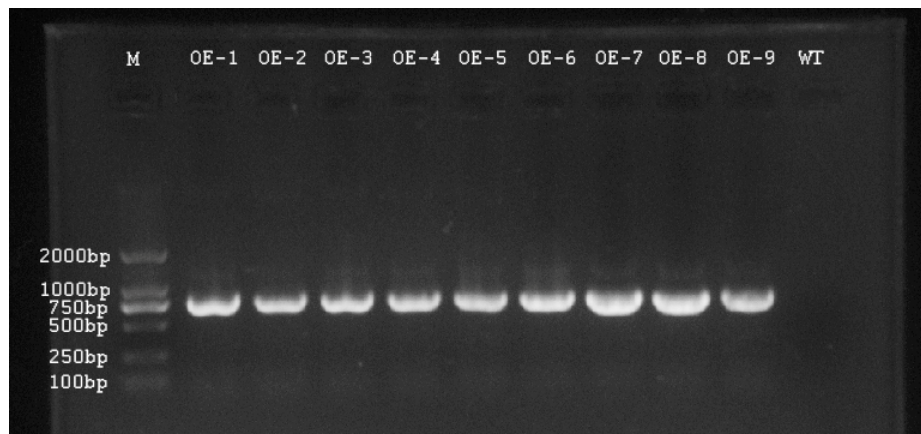

**Figure S2.** PCR Detection of *CpBBX19* overexpression *Arabidopsis*. OE-1-9: *CpBBX19* transgenic *Arabidopsis*; WT: wild-type *Arabidopsis*. M: DNA Maker DL2000.
